# Supplementary material
Source: PubMed Central journal article supplement (PMC2919922)
Supplement: 1000784107_pnas.201000784SI.pdf [file 1000784107_pnas.201000784SI.pdf]

# Supporting Information

Roffé et al. 10.1073/pnas.1000784107

## SI Methods

**Metabolic Labeling with [<sup>35</sup>S]-Methionine.** Primary hippocampal cells (10<sup>6</sup>) from either *Pmp*<sup>+/+</sup> or *Pmp*<sup>0/0</sup>, or 10<sup>4</sup> N2a or SN-56 cells, were plated for 24 h. For hippocampal cultures, half of the culture medium was substituted with DMEM lacking methionine (Invitrogen) and 10 μCi/mL of [<sup>35</sup>S]-Met (Perkin-Elmer) was added 15 min before treatment. Hippocampal cells were treated with STI1, 2.4 μM Δ, 80 μM PepSTI1<sub>230–245</sub>, or 80 μM Pep-STI1<sub>61–76</sub> for 30 min. When inhibitors were used, neurons were preincubated with 5 μM Ly294002, 20 nM rapamycin, 50 μM PD98059, or 1.5 μM actinomycin D along with <sup>35</sup>S-Met for 15 min, followed by 2.4 μM STI1 for 30 min. For N2a and SN-56 cells, all medium was replaced with DMEM lacking methionine and 4 μCi/mL of [<sup>35</sup>S]-Met (Perkin-Elmer) was added 15 min before stimulating with 2.4 μM STI1 for 30 min. A 300-μg quantity of synaptosomes was prewarmed in homogenization buffer for 10 min at 37 °C in the presence of 15 μCi [<sup>35</sup>S]-Met, followed by treatment with 2.4 μM STI1 for 30 min. Cells or synaptosomes were rinsed with ice-cold PBS and lysed in RIPA buffer. Lysates were spotted onto 3MM filter paper (Whatmann) previously blocked with 100× glutamine solution (Invitrogen). Filter papers were allowed to air dry and were subsequently incubated in ice-cold 20% trichloroacetic acid for 20 min. Filter papers were boiled in 10% trichloroacetic acid for 15 min and air dried. The remaining radioactivity was measured by scintillation counting.

**Synaptosome Preparations.** Synaptosomes were prepared from 3-wk-old WT (*Pmp*<sup>+/+</sup>) mice as described previously (1) with a few modifications. Briefly, dissected cortex was homogenized at 4 °C in 10 volumes of homogenization buffer (118 mM NaCl, 4.7 mM KCl, 1.2 mM MgSO<sub>4</sub>, 2.5 mM CaCl<sub>2</sub>, 1.53 mM KH<sub>2</sub>PO<sub>4</sub>, 212.7 mM glucose, and 0.2 mM DTT, pH 7.4), supplemented with Complete Protease Inhibitor Mixture (Roche) and 200 μg/mL chloramphenicol (Sigma). The homogenate was passed through two 100-μm nylon filters and one 5-μm PVDF membrane (Millipore), and centrifuged. Supernatants were discarded between filtration steps. The final filtrate was centrifuged at 1,000 × g for

10 min, and the pellet was washed, resuspended in homogenization buffer, and used immediately for protein synthesis assays.

**Polysome Profiles.** Primary cultures of cortical neurons (1.5 × 10<sup>8</sup> cells for each condition, 5 d in vitro) were treated with 2.4 μM STI1 for 30 min, followed by treatment with 100 μg/mL cycloheximide for 3 min at 37 °C. Cells were washed with PBS containing 100 μg/mL cycloheximide, lysed in 300 μl lysis buffer (20 mM Tris · HCl pH 7.5, 100 mM KCl, 10 mM MgCl<sub>2</sub>, 1% Triton X-100, 1 mM DTT, 100 μg/mL cycloheximide, and protease inhibitor mixture) and cleared by two centrifugations at 16,100 × g for 10 min at 4 °C. Ten A<sub>254nm</sub> units of extract were applied to a linear 7–47% sucrose gradient prepared in 20 mM Tris · HCl (pH 7.5), 100 mM KCl, 10 mM MgCl<sub>2</sub>, and 1 mM DTT and centrifuged for 2.5 h at 39,000 rpm in a SW41Ti rotor (Beckman Coulter) at 4 °C. The gradients were collected from the top, and absorbance at 254 nm was detected in a continuous flow. Quantification was performed in ImageJ software (National Institutes of Health) by measuring the area under the peak of 80S and the polysomes and calculating the polysomes/monosome ratio.

**PK Digestion.** Primary hippocampal neurons were lysed and a fraction was kept as control, nondigested extract. The remaining lysate was digested with 20 μg/mL of PK at 37 °C for 30 min. Proteins were separated by SDS/PAGE and immunoblotted with anti-PrP<sup>C</sup> antibody 4H11.

**Detection of PrP<sup>Sc</sup> by Immunofluorescence Microscopy.** Primary hippocampal neurons exposed to 22L-infected brain homogenate were fixed after 3 d and permeabilized by 0.1% Triton X-100, and proteins were denatured using 6 M guanidinium hydrochloride. Prion fluorescence was detected using antibody 4H11 and Cy3-conjugated secondary antibody (Dianova). Slides were mounted in Permafluor Aqueous Mounting Medium Liquid (Beckman Coulter), and confocal laser scanning microscopy was performed on an LSM 510 laser-scanning microscope (Zeiss). Mock-infected cells were imaged and the detector threshold was set, as no image could be seen in the red channel, and fluorescence from 22L-infected cells was detected.

1. Villasana, et al. (2006) Rapid isolation of synaptoneurosome and postsynaptic densities from adult mouse hippocampus. *J Neurosci Methods* 158:30–36.

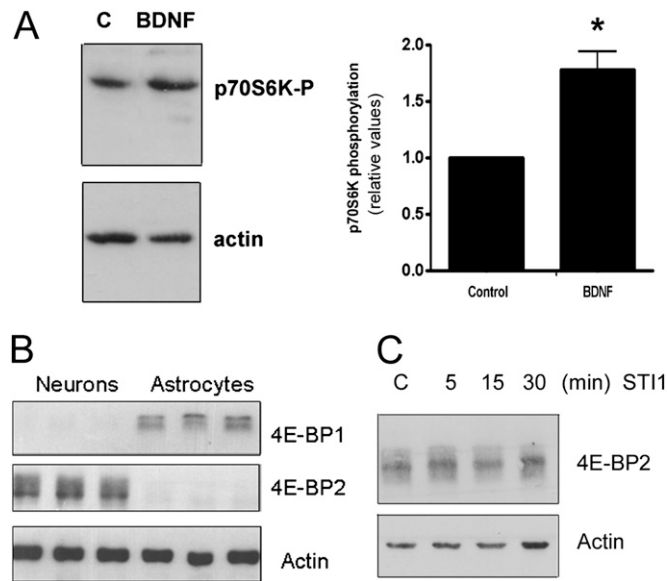

**Fig. S1.** 4E-BP2 is predominantly expressed in neurons and its expression is unaltered by STI1. The mTOR pathway can still be stimulated in *Prnp<sup>0/0</sup>* cells. (A) *Prnp<sup>0/0</sup>* primary cultured hippocampal neurons were treated with 100 ng/mL BDNF for 15 min. Cell extracts were resolved in SDS/PAGE followed by immunoblotting with antibodies against phospho-p70S6K and actin. The phospho-p70S6K/actin ratio was calculated, and phosphorylation relative to control was plotted in the graph. \*Statistically different from control. Student *t* test,  $P < 0.01$ . (B) *Prnp<sup>+/+</sup>* primary cultured hippocampal neuron and astrocyte lysates were resolved in SDS/PAGE followed by immunoblotting with antibodies against 4E-BP1, 4E-BP2, and actin. (C) Immunoblotting from lysates of primary cultured hippocampal *Prnp<sup>+/+</sup>* neurons treated with 2.4  $\mu$ M STI1 for the indicated time.

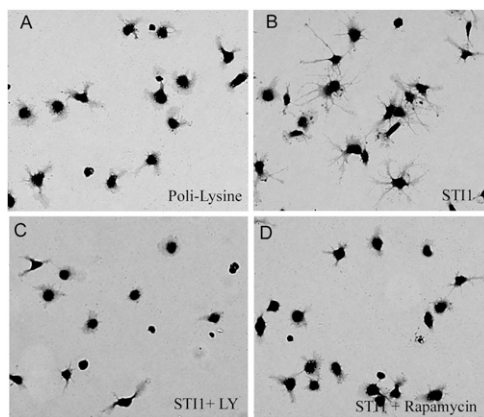

**Fig. S2.**  $Prp^C$ -STI1-induced neuritogenesis is dependent on PI3K and mTOR signaling. Hippocampal *Prnp<sup>+/+</sup>* neurons were cultured in the absence (A) or presence of 0.6  $\mu$ M STI1 (B), STI1 plus Ly294002 (C), or STI1 plus rapamycin (D) for 24 h. Cells were fixed and stained, and representative images were taken.
